# Supplementary material for: An approach to identifying drug resistance associated mutations in bacterial strains
Source: PubMed Central journal article supplement (PMC3521396; doi:10.1186/1471-2164-13-s7-s23), 2012-12-07
Supplement: 1471-2164-13-S7-S23-S2.pdf [file 1471-2164-13-S7-S23-S2.pdf]

| Gene identifier                     | NWS  | p-value  | Drug resistance and gene gain/loss profiles |
|-------------------------------------|------|----------|---------------------------------------------|
| Penicillin (NWS-threshold: 0.62)    |      |          |                                             |
| SAR1831(blaZ)                       | 0.81 | 1.15e-06 |                                             |
| SAR1829(blaI)                       | 0.74 | 5.24e-06 |                                             |
| SAR1830(blaR1)                      | 0.73 | 7.09e-06 |                                             |
| SAR0056                             | 0.71 | 1.03e-05 |                                             |
| SAR0039(mecA)                       | 0.70 | 1.28e-05 |                                             |
| SAR0060(ccrA)                       | 0.63 | 4.40e-05 |                                             |
| SAR0061(yycG)                       | 0.63 | 4.40e-05 |                                             |
| NWMN_0025                           | 0.63 | 4.41e-05 |                                             |
| SAR0037(ugpQ)                       | 0.63 | 5.08e-05 |                                             |
| SAR0038(maoC)                       | 0.63 | 5.08e-05 |                                             |
| Meticillin (NWS-threshold: 0.68)    |      |          |                                             |
| SAR0039(mecA)                       | 1.00 | 4.48e-20 |                                             |
| SAR0037(ugpQ)                       | 0.94 | 6.77e-15 |                                             |
| SAR0038(maoC)                       | 0.94 | 6.77e-15 |                                             |
| SAR0056                             | 0.85 | 7.55e-12 |                                             |
| SAR0036                             | 0.80 | 5.77e-11 |                                             |
| SAR0057                             | 0.75 | 6.47e-10 |                                             |
| SAR0060(ccrA)                       | 0.73 | 1.40e-09 |                                             |
| SAR0061(yycG)                       | 0.73 | 1.40e-09 |                                             |
| MW0028(ebpS)                        | 0.71 | 2.76e-09 |                                             |
| Tetracycline (NWS-threshold: 0.37)  |      |          |                                             |
| SAAV_b3(repC)                       | 0.64 | 5.70e-08 |                                             |
| SATW20_00660(tet)                   | 0.64 | 5.70e-08 |                                             |
| SATW20_00670(pre)                   | 0.50 | 3.51e-06 |                                             |
| SATW20_04620(tetM)                  | 0.37 | 7.54e-05 |                                             |
| SATW20_08990(virE)                  | 0.37 | 7.67e-05 |                                             |
| SATW20_09000                        | 0.37 | 7.67e-05 |                                             |
| SATW20_09010(lipA)                  | 0.37 | 7.67e-05 |                                             |
| Erythromycin (NWS-threshold: 0.39)  |      |          |                                             |
| SAR0050(ermA1)                      | 0.58 | 1.36e-06 |                                             |
| CGSSa03_12660                       | 0.44 | 2.98e-05 |                                             |
| Gentamicin (NWS-threshold: 0.83)    |      |          |                                             |
| SaurJH1_2806(aacA-aphD)             | 0.90 | 9.38e-11 |                                             |
| SaurJH1_2805                        | 0.83 | 2.95e-09 |                                             |
| Ciprofloxacin (NWS-threshold: 0.45) |      |          |                                             |
| SATW20_04610(thiI)                  | 0.45 | 1.33e-07 |                                             |
