# Supplementary material for: An approach to identifying drug resistance associated mutations in bacterial strains
Source: PubMed Central journal article supplement (PMC3521396; doi:10.1186/1471-2164-13-s7-s23), 2012-12-07
Supplement: 1471-2164-13-S7-S23-S5.pdf [file 1471-2164-13-S7-S23-S5.pdf]

| Gene identifier                    | desc.   | NWS  | p-value  | Drug resistance and point mutation profiles                                         |                                                                                     |
|------------------------------------|---------|------|----------|-------------------------------------------------------------------------------------|-------------------------------------------------------------------------------------|
| Penicillin (NWS-threshold: 0.4)    |         |      |          | 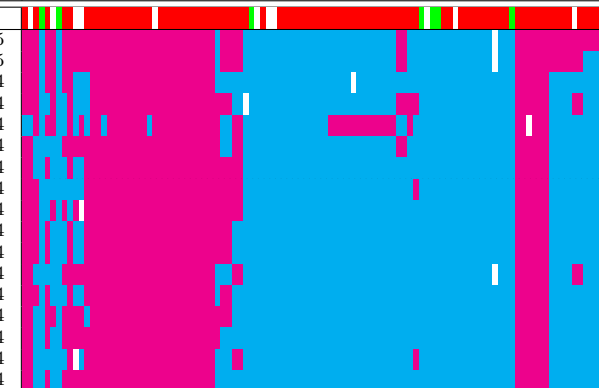   |                                                                                     |
| SAR0023(sasH)                      | G723D   | 0.63 | 1.87e-05 |    |                                                                                     |
| SAR0023(sasH)                      | T725A   | 0.62 | 2.23e-05 |                                                                                     |                                                                                     |
| SAR0304                            | V295I   | 0.49 | 3.25e-04 |                                                                                     |                                                                                     |
| SAR2791                            | V182M   | 0.46 | 5.41e-04 |                                                                                     |                                                                                     |
| SAR2700                            | N493KD  | 0.45 | 6.16e-04 |                                                                                     |                                                                                     |
| SAR0233(hmp)                       | Q333K   | 0.44 | 7.21e-04 |                                                                                     |                                                                                     |
| SAR0318(sbnA)                      | N25HK   | 0.43 | 8.36e-04 |                                                                                     |                                                                                     |
| SAR2664                            | V282AT  | 0.43 | 8.36e-04 |                                                                                     |                                                                                     |
| SAR2779                            | S48G    | 0.43 | 8.36e-04 |                                                                                     |                                                                                     |
| SAR0318(sbnA)                      | T138IM  | 0.43 | 8.36e-04 |                                                                                     |                                                                                     |
| SAR0318(sbnA)                      | T139AQ  | 0.43 | 8.36e-04 |                                                                                     |                                                                                     |
| SAR0023(sasH)                      | A749TG  | 0.43 | 8.44e-04 |                                                                                     |                                                                                     |
| SAR0318(sbnA)                      | R130CG  | 0.43 | 8.72e-04 |                                                                                     |                                                                                     |
| SAR0322(folC)                      | H201YQE | 0.43 | 8.72e-04 |                                                                                     |                                                                                     |
| SAR0233(hmp)                       | K323ET  | 0.42 | 9.08e-04 |                                                                                     |                                                                                     |
| SAR2750(icaC)                      | I21V    | 0.42 | 9.46e-04 |                                                                                     |                                                                                     |
| SAR0233(hmp)                       | S309RN  | 0.42 | 9.46e-04 |                                                                                     |                                                                                     |
| Meticillin (NWS-threshold: 0.25)   |         |      |          |                                                                                     |   |
| SAR0198(oppF)                      | T287IK  | 0.29 | 1.41e-04 |                                                                                     |   |
| SAR0420                            | I72F    | 0.29 | 1.41e-04 |                                                                                     |                                                                                     |
| SAR2508(sbi)                       | S219AT  | 0.29 | 1.41e-04 |                                                                                     |                                                                                     |
| SAR2508(sbi)                       | N222QK  | 0.29 | 1.41e-04 |                                                                                     |                                                                                     |
| SAR2508(sbi)                       | K224SDN | 0.29 | 1.41e-04 |                                                                                     |                                                                                     |
| Tetracycline (NWS-threshold: 0.2)  |         |      |          |   |                                                                                     |
| SAR1840                            | D291YS  | 0.23 | 7.09e-04 |   |                                                                                     |
| SAR2336(rpsJ)                      | K57M    | 0.23 | 7.32e-04 |                                                                                     |                                                                                     |
| SAR0550(rpsL)                      | K113R   | 0.20 | 1.14e-03 |                                                                                     |                                                                                     |
| Erythromycin (NWS-threshold: 0.2)  |         |      |          |   |                                                                                     |
| SAR0576                            | A68EV   | 0.21 | 8.89e-04 |   |                                                                                     |
| Gentamicin (NWS-threshold: 0.21)   |         |      |          |   |                                                                                     |
| SAR1840                            | L289IW  | 0.29 | 1.43e-03 |   |                                                                                     |
| SAR1840                            | D291YS  | 0.29 | 1.43e-03 |                                                                                     |                                                                                     |
| SAR1840                            | H327RF  | 0.29 | 1.43e-03 |                                                                                     |                                                                                     |
| SAR1167(ylmH)                      | K215N   | 0.29 | 1.43e-03 |                                                                                     |                                                                                     |
| SAR1167(ylmH)                      | R216V   | 0.29 | 1.43e-03 |                                                                                     |                                                                                     |
| SAR1167(ylmH)                      | V217L   | 0.29 | 1.43e-03 |                                                                                     |                                                                                     |
| SAR0547(rpoB)                      | D471YG  | 0.21 | 4.61e-03 |                                                                                     |                                                                                     |
| SAR1833(trmB)                      | T54IK   | 0.21 | 4.61e-03 |                                                                                     |                                                                                     |
| Ciprofloxacin (NWS-threshold: 0.2) |         |      |          |                                                                                     |  |
| SAR1367(graI)                      | S80YF   | 1.00 | 6.03e-30 |  |                                                                                     |
| SAR0006(gyrA)                      | S90AL   | 0.88 | 1.92e-18 |                                                                                     |                                                                                     |
| SAR2449(lytT)                      | V45I    | 0.20 | 2.06e-04 |                                                                                     |                                                                                     |
| SAR1840                            | L289IW  | 0.20 | 4.56e-04 |                                                                                     |                                                                                     |
| SAR1793(thiI)                      | A92ET   | 0.20 | 2.06e-04 |                                                                                     |                                                                                     |
| SAR2212(murA2)                     | A102T   | 0.20 | 2.06e-04 |                                                                                     |                                                                                     |
